# Supplementary material for: Tailoring perpendicular magnetic anisotropy with graphene oxide membranes
Source: Royal Society of Chemistry journal article supplement (doi:10.1039/c7ra08644j), 2017-01-01
Supplement: c7ra08644j1.pdf [file c7ra08644j1.pdf]

## Supplementary Information:

### Tailoring perpendicular magnetic anisotropy with graphane oxide membranes

Keyu Ning<sup>a,b</sup>, Houfang Liu<sup>\*a,b</sup>, Linsen Li<sup>a,b</sup>, Huanglong Li<sup>c</sup>, Jiafeng Feng<sup>d</sup>, Baishun Yang<sup>d</sup>, Xiao liu<sup>a,b</sup>, Yuxing Li<sup>a,b</sup>, Yanhui Chen<sup>e</sup>, Hongxiang Wei<sup>d</sup>, Xiufeng Han<sup>d</sup>, Shengcheng Mao<sup>e</sup>, Xixiang Zhang<sup>f</sup>, Yi Yang<sup>a,b</sup>, and Tian-ling Ren<sup>\*a,b</sup>

<sup>a</sup>Institute of Microelectronics, Tsinghua University, Beijing 100084, China

<sup>b</sup>Tsinghua National Laboratory for Information Science and Technology, Tsinghua University, Beijing 100084, China

<sup>c</sup>Department of Precision Instrument, Tsinghua University, Beijing 100084, China

<sup>d</sup>Beijing National Laboratory of Condensed Matter Physics, Institute of Physics, University of Chinese Academy of Science, Chinese Academy of Sciences, Beijing 100190, China

<sup>e</sup>Institute of Microstructure and Property of Advanced Materials, Beijing University of Technology, Beijing, 100124, China

<sup>f</sup>Physical Science and Engineering, King Abdullah University of Science and Technology (KAUST), Thuwal 239955, Kingdom of Saudi Arabia

### *M-H* loops for CoFeB/MgAlO<sub>x</sub> stacks with and without GO membranes after annealing:

Figure S1 shows some samples with annealing temperature at 300 °C. It is obviously that the PMA were enhanced strongly for both samples with/without GO membranes. For the samples with  $t_{\text{CoFeB}} = 0.8$  to 1.4 nm, the hysteresis loops with increased SQ for both samples with/without GO membranes. It is obvious that samples with  $t_{\text{CoFeB}} = 1.4$  nm without GO membranes and the samples with  $t_{\text{CoFeB}} = 1.6$  nm with GO membranes, the easy axis turns from in-plane to out-of-plane after annealing. Also, the in-plane saturation field increases for  $t_{\text{CoFeB}} = 0.8$  to 1.4 nm the samples with GO compared to the samples without GO. While for samples with  $t = 1.6$  nm with GO, the easy axis turns from in-plane to out-of-plane. These results indicate that the GO membranes can significantly improve the PMA of CoFeB thin film.

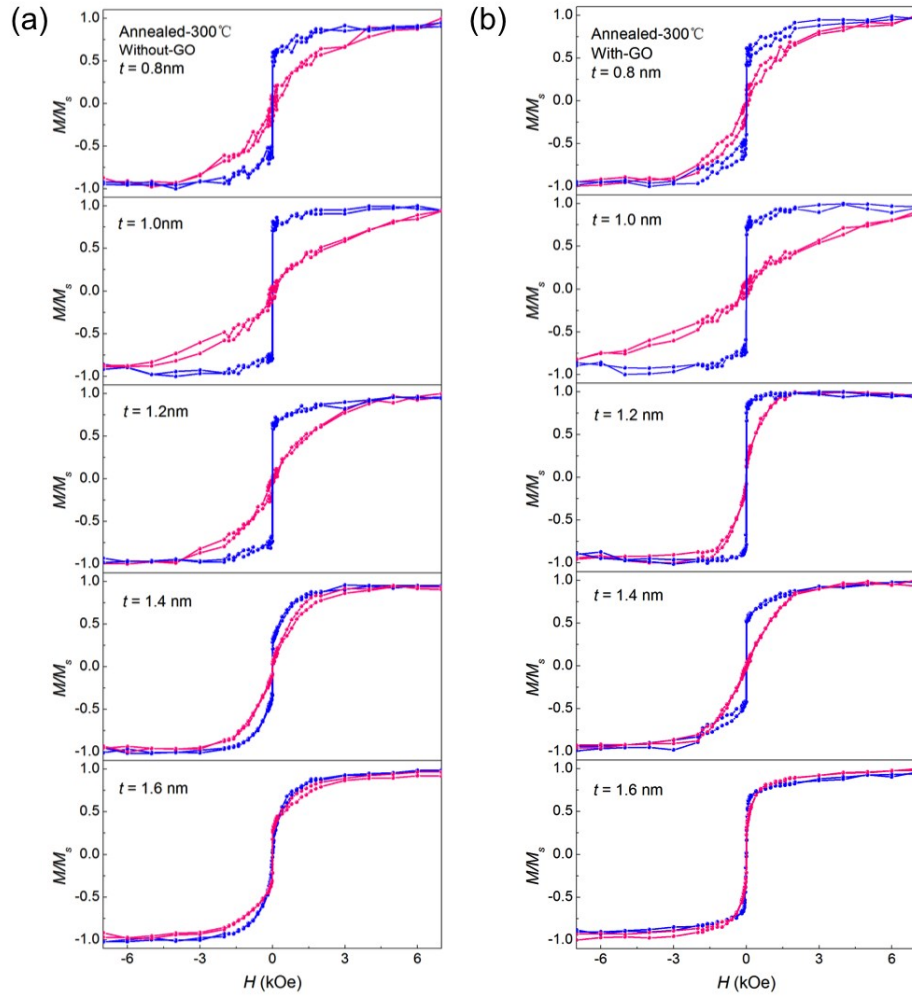

**Figure S1.** In-plane (red line with solid circles) and out-of-plane (blue line with solid circles) magnetization curves for samples after annealing at 300 °C with (a) and without (b) GO membranes with the thickness of CoFeB layer of  $t_{\text{CoFeB}} = 0.8, 1.0, 1.2, 1.4,$  and  $1.6$  nm, respectively.
